# Supplementary material for: Enhanced room temperature ionic conductivity of the LiBH4·1/2NH3–Al2O3 composite
Source: Royal Society of Chemistry journal article supplement (doi:10.1039/d0cc07296f), 2021-01-01
Supplement: d0cc07296f1.pdf [file d0cc07296f1.pdf]

## Electronic Supplementary Information (ESI)

### Enhanced Room Temperature Ionic Conductivity in the $\text{LiBH}_4 \cdot \frac{1}{2}\text{NH}_3\text{-Al}_2\text{O}_3$ Composite

Ruixue Zhang,<sup>a</sup> Wanying Zhao,<sup>b</sup> Zhenzhen Liu,<sup>b</sup> Shanghai Wei,<sup>c</sup> Yigang Yan,<sup>\*ad</sup>  
Yungui Chen,<sup>\*ad</sup>

<sup>a</sup> Institute of New Energy and Low-Carbon Technology, Sichuan University  
Chengdu 610207, China; Email: yigang.yan@scu.edu.cn, chenyingui@scu.edu.cn

<sup>b</sup> College of Materials Science and Engineering, Sichuan University, Chengdu 610065,  
China.

<sup>c</sup> Department of Chemical & Materials Engineering, Faculty of Engineering, the  
University of Auckland, Auckland 1142, New Zealand.

<sup>d</sup> Engineering Research Center of Sustainable Energy Materials and Devices, Ministry  
of Education, China

#### Experimental Methods:

$\text{LiBH}_4$  ( $\geq 95\%$ , Sigma-Aldrich),  $\text{LiNH}_2$  ( $95\%$ , Sigma-Aldrich) and  $\text{LiOH}$  ( $\geq 98\%$ , Sigma-Aldrich) were used directly without extra purification.  $\gamma\text{-Al}_2\text{O}_3$  nanopowders ( $99.99\%$ , Beijing Deke Daojin Science and Technology Co. Ltd) were dried at  $350^\circ\text{C}$  for 24 h under vacuum to remove the adsorbed water and oxygen. To synthesize  $\text{LiBH}_4 \cdot \frac{1}{2}\text{NH}_3\text{-Al}_2\text{O}_3$  composite, 1 g mixture of  $\text{LiBH}_4$ ,  $\text{LiNH}_2$ ,  $\text{LiOH}$  and  $\text{Al}_2\text{O}_3$  was mechanically milled in a 50 mL sealed stainless-steel milling jar at 300 rpm for 0.5 h with a ball-to-sample mass ratio of 20:1 using a planetary ball mill (PMQ0.4L). Subsequently, the mixture was annealed at  $60^\circ\text{C}$  for 20 h under Ar atmosphere. The molar ratio of  $\text{LiBH}_4$ ,  $\text{LiNH}_2$  and  $\text{LiOH}$  was fixed as 2:1:1. The addition amount of  $\text{Al}_2\text{O}_3$  was set as 30, 45, 53, 60, 63, 67 and 75 wt%  $\text{Al}_2\text{O}_3$ , respectively. All sample

handlings were performed in an Ar-filled glovebox (MIKROUNA, China,  $\text{H}_2\text{O} < 0.01$  ppm and  $\text{O}_2 < 0.01$  ppm).

X-ray diffraction (XRD) measurements were carried out using  $\text{Cu K}\alpha$  ( $\lambda=1.5416 \text{ \AA}$ ) radiation with the  $2\theta$  range of  $20-70^\circ$  and a scan rate of  $0.026^\circ\cdot\text{s}^{-1}$  using EMPYREAN X-ray diffractometer. Investigated powder was sealed by 3M 7413D tape to prevent the air exposure. Differential scanning calorimetry (DSC) measurements were performed using a Mettler-Toledo TGA/DSC2 instrument ( $\text{N}_2$  flow:  $50 \text{ mL min}^{-1}$ , ramp:  $5^\circ\text{C min}^{-1}$ , temperature range:  $-40$  to  $80^\circ\text{C}$ ) and the samples were filled in Al pan in Ar-filled glovebox. Fourier-transform infrared (FTIR) spectra were collected using Thermo Fisher Nicolet iS50 ATR spectrometer with the resolution of  $4 \text{ cm}^{-1}$ . The morphologies of the samples were observed using Titan G2 transmission electron microscopy (TEM) with a vacuum transfer chamber.

The X-ray photoelectron spectroscopy (XPS) spectra were recorded on Thermo Scientific K-Alpha+, XPS system. The samples transfer and handling process were protected under inert gas. The binding energies of B 1s, Li 1s, N 1s, O 1s and Al 2p calibrated with C 1s peak ( $\text{BE} = 284.6 \text{ eV}$ ) as a standard.

Ionic conductivity was measured by electrochemical impedance spectroscopy (EIS) using Mult Autolab M204 electrochemical workstation. Au films were used as blocking electrodes and frequency varies from  $1 \text{ Hz}$  to  $1 \text{ MHz}$ . The powder samples were pressed into pellets in diameter of  $0.6 \text{ mm}$  with thickness of  $\sim 1 \text{ mm}$  under a pressure of  $0.3 \text{ GPa}$ . The temperature range for the EIS measurement was set as  $30$  to  $80^\circ\text{C}$  with a step of  $10^\circ\text{C}$  and dwell time of  $2 \text{ h}$ . The ionic conductivity was obtained

using the following equation

$$\sigma = \frac{d}{R S} \quad (1)$$

where  $d$  is the thickness of the electrolyte,  $R$  is the resistance which is determined as the intersection of curve with the  $Z'$  axis and  $S$  is the contact area between the electrode and electrolyte.

Cyclic voltammetry (CV) test at a scan rate of  $0.5 \text{ mV s}^{-1}$  was performed at room temperature (RT) from  $-0.5$  to  $4.0 \text{ V}$  with a  $\text{Li} | \text{LiBH}_4 \cdot \frac{1}{2} \text{NH}_3 - \text{Al}_2\text{O}_3 | \text{SS}$  (SS: stainless steel) cell using an electrochemical work station (DH7000, Donghua, China). The galvanostatic plating-stripping test was conducted using an  $\text{Li} | \text{LiBH}_4 \cdot \frac{1}{2} \text{NH}_3 - \text{Al}_2\text{O}_3 | \text{Li}$  symmetric cell at the constant current density of  $\pm 0.1 \text{ mA cm}^{-2}$  at  $30 \text{ }^\circ\text{C}$ .

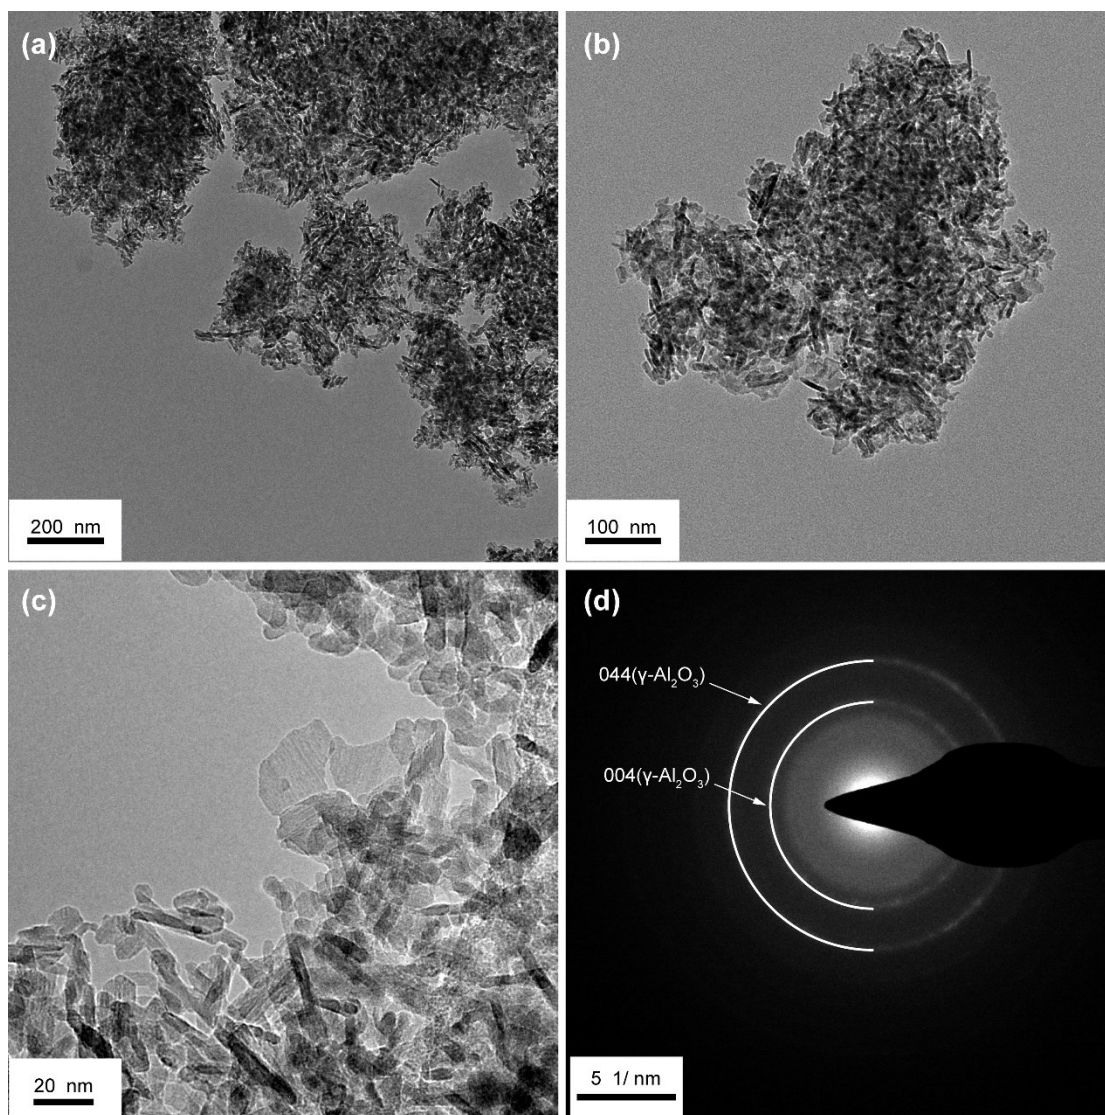

Fig. S1 (a), (b) and (c): TEM images of the  $\gamma$ - $\text{Al}_2\text{O}_3$  nanopowders; (d) the SAED pattern.

$\gamma$ - $\text{Al}_2\text{O}_3$  nanopowders show the typical particle morphology with sharp edge, containing short rods and hexagons. SAED pattern in (d) displays two concentric rings assigned to the (004) and (044) crystal planes of  $\gamma$ - $\text{Al}_2\text{O}_3$ , respectively.

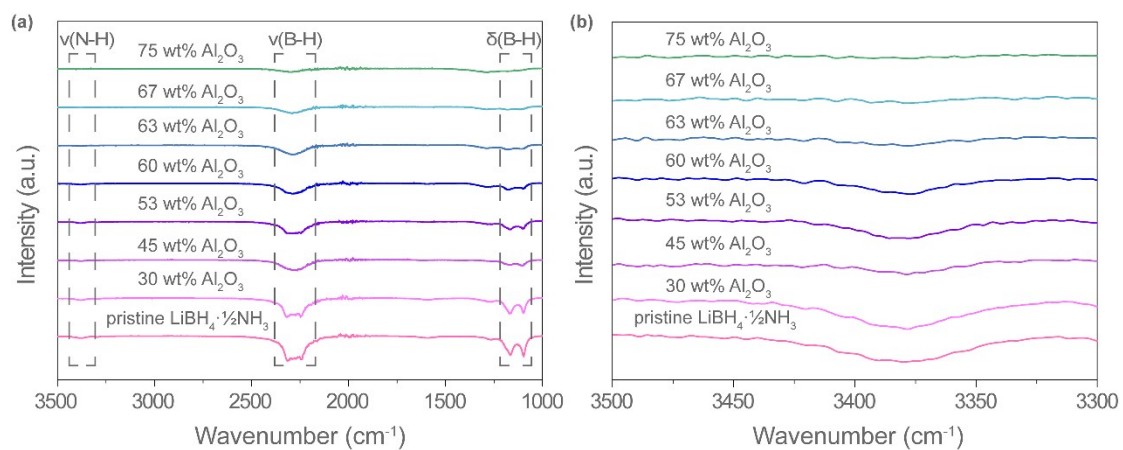

Fig. S2 (a) ATR-FTIR spectra of the  $\text{LiBH}_4 \cdot \frac{1}{2}\text{NH}_3$ - $\text{Al}_2\text{O}_3$  composites with different amounts of  $\text{Al}_2\text{O}_3$ , compared with the pristine  $\text{LiBH}_4 \cdot \frac{1}{2}\text{NH}_3$  and (b) magnified curves of 3500–3300  $\text{cm}^{-1}$  wavenumber on the part of N-H vibration.

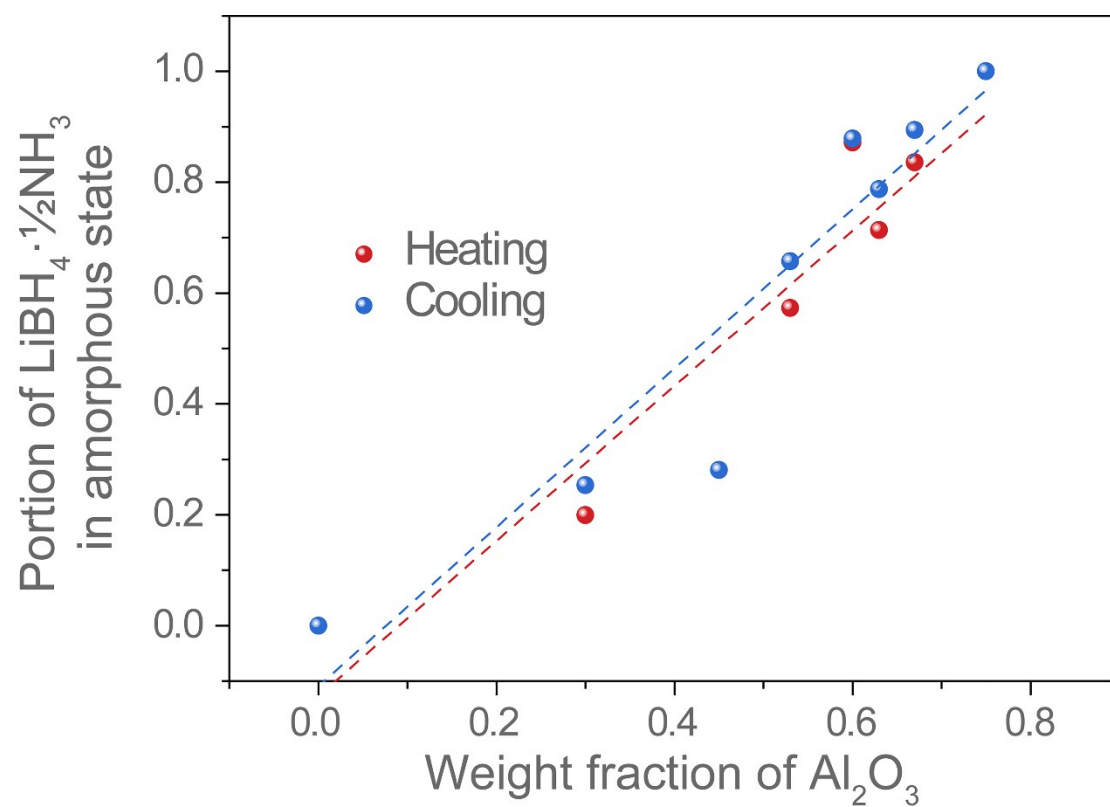

Fig. S3 Portion of  $\text{LiBH}_4 \cdot \frac{1}{2}\text{NH}_3$  in amorphous state of pristine  $\text{LiBH}_4 \cdot \frac{1}{2}\text{NH}_3$  and  $\text{LiBH}_4 \cdot \frac{1}{2}\text{NH}_3$ - $\text{Al}_2\text{O}_3$  composites calculated in the heating/cooling process.

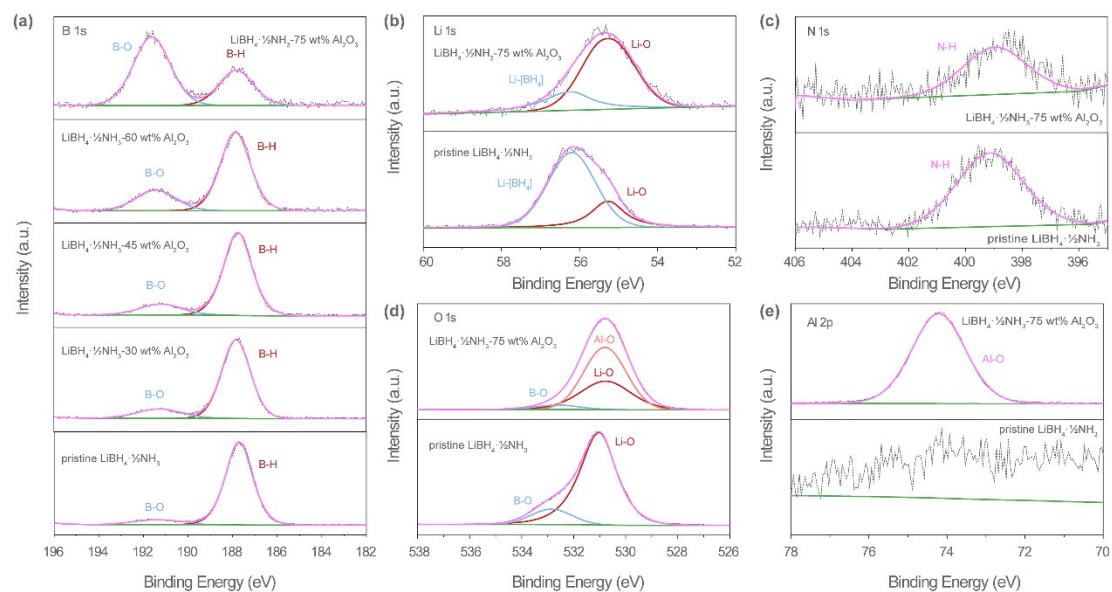

Fig. S4 (a) B 1s XPS spectra of  $\text{LiBH}_4 \cdot \frac{1}{2}\text{NH}_3$ - $\text{Al}_2\text{O}_3$ , (b) Li 1s, (c) N 1s, (d) O 1s and (e) Al 2p XPS spectra of  $\text{LiBH}_4 \cdot \frac{1}{2}\text{NH}_3$ -75 wt%  $\text{Al}_2\text{O}_3$  compared with the pristine  $\text{LiBH}_4 \cdot \frac{1}{2}\text{NH}_3$  without  $\text{Al}_2\text{O}_3$  addition.

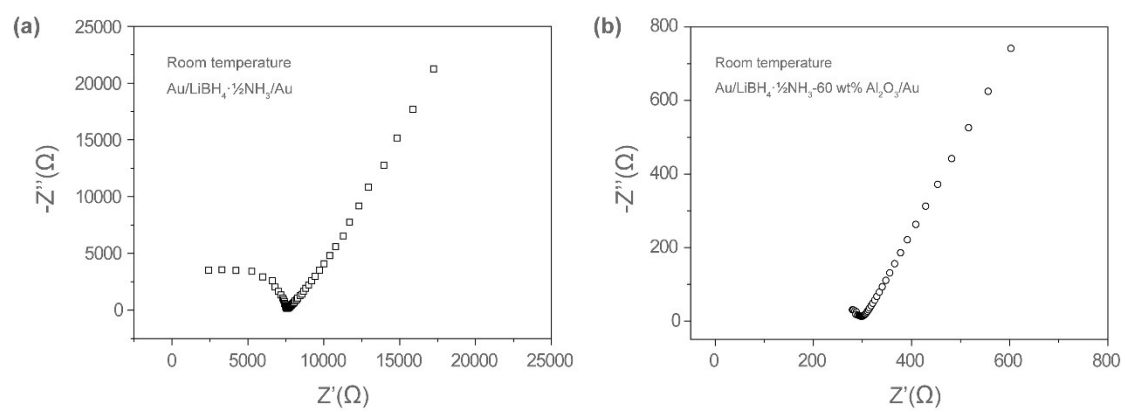

Fig. S5 Nyquist plots of (a)  $\text{LiBH}_4 \cdot \frac{1}{2}\text{NH}_3$  and (b)  $\text{LiBH}_4 \cdot \frac{1}{2}\text{NH}_3\text{-60 wt\% Al}_2\text{O}_3$  at room temperature.

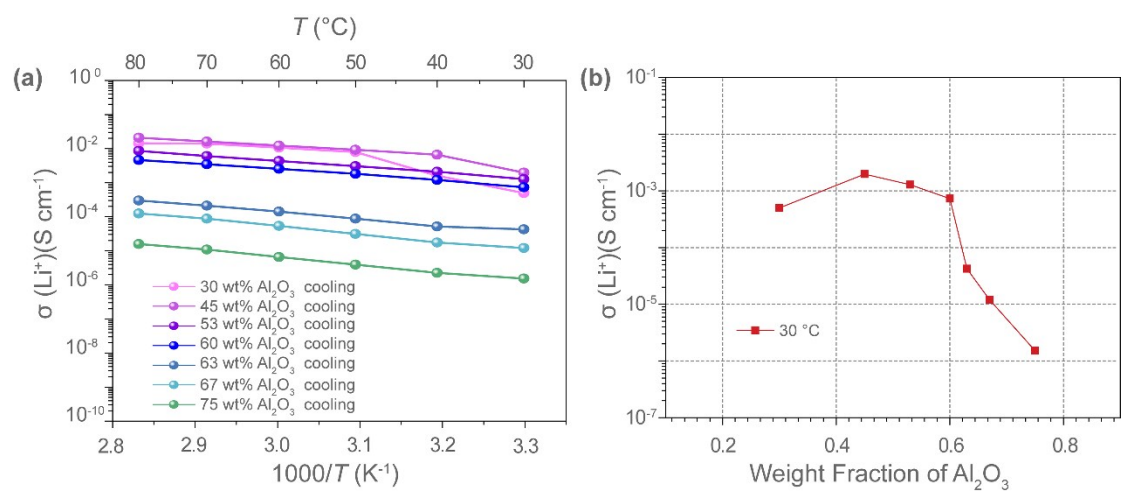

Fig. S6 (a) Temperature-dependent Li-ion conductivities and (b) Li-ion conductivities at 30 °C of as a function of  $\text{Al}_2\text{O}_3$  amount of the  $\text{LiBH}_4 \cdot \frac{1}{2}\text{NH}_3$ - $\text{Al}_2\text{O}_3$  composite in cooling process.

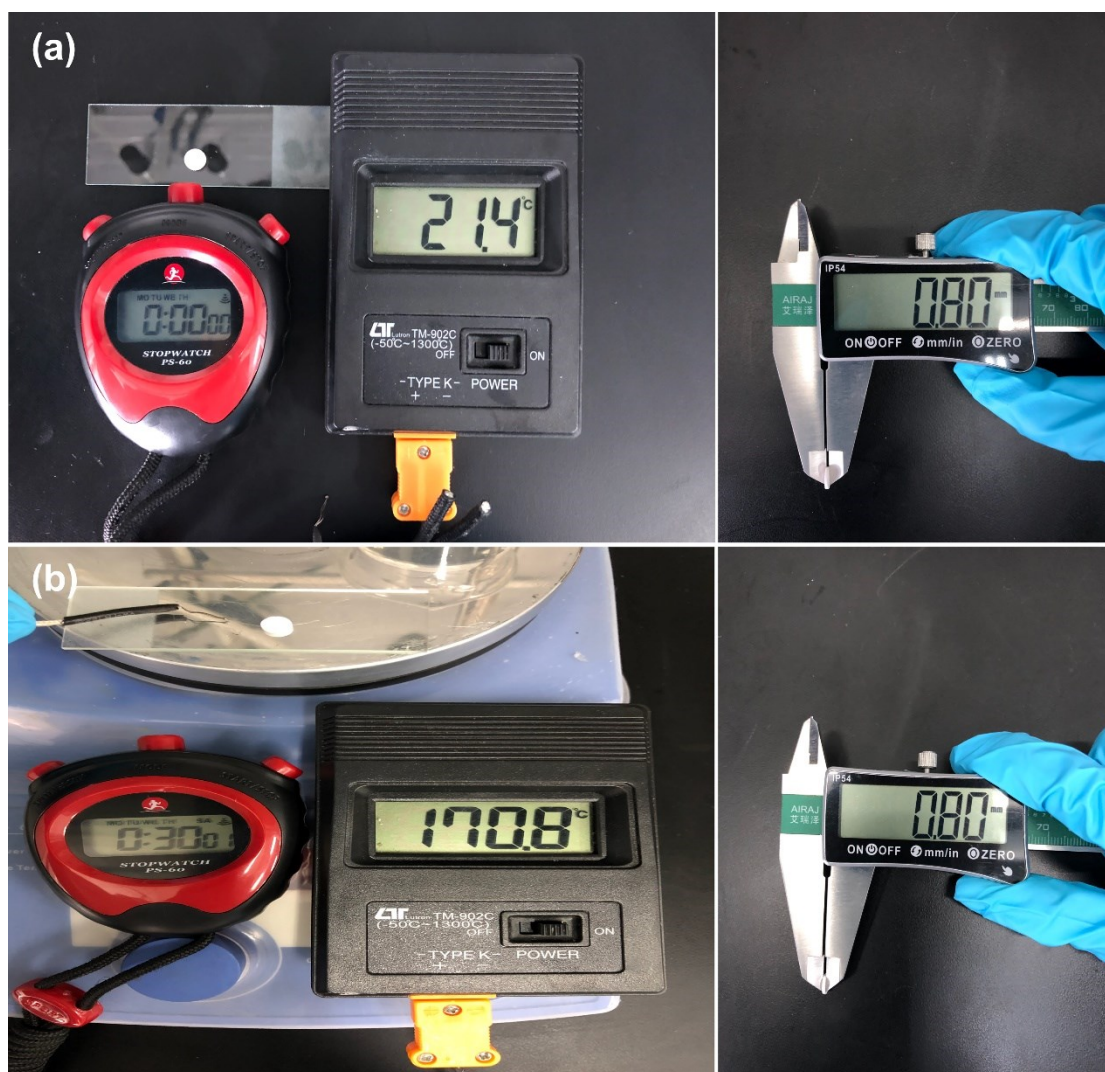

Fig. S7 Tests of a  $\text{LiBH}_4 \cdot \frac{1}{2}\text{NH}_3$ -60 wt%  $\text{Al}_2\text{O}_3$  pellet heated at 170 °C for 0.5 h in air.
